# Supplementary material for: An effective approach to improve the electrochemical performance of LiNi0.6Co0.2Mn0.2O2 cathode by an MOF-derived coating
Source: Royal Society of Chemistry journal article supplement (doi:10.1039/c5ta10773c), 2016-01-01
Supplement: c5ta10773c1.pdf [file c5ta10773c1.pdf]

## Supporting Information for

# Effect approach to improve the electrochemical performance of $\text{LiNi}_{0.6}\text{Co}_{0.2}\text{Mn}_{0.2}\text{O}_2$ cathode material by MOF-derived coating

Siwu Li, Xiaotao Fu, Junwen Zhou,\* Yuzhen Han, Pengfei Qi, Xing Gao, Xiao Feng and Bo Wang\*

### Experimental section

The synthesis of  $\text{NH}_2\text{-MIL-53 (Al)}$  was carried out as reported elsewhere.<sup>1</sup> Briefly, aluminum chloride hexahydrate ( $\text{AlCl}_3 \cdot 6\text{H}_2\text{O}$ , 3.863 g, 16 mmol) 2-aminobenzene-1,4-dicarboxylate (abdc, 2.898 g, 16 mmol) was dissolved in 60 mL deionized water in a 100 mL Teflon-lined autoclave and heated at 150 °C for 9 h to form light yellow powder. After cooling to room temperature, the products were separated by centrifugation, then heated in  $N,N$ -dimethylformamide (DMF) at 150 °C for 24 h to remove the remaining abdc, during which the solvent was decanted and repeatedly replenished. After that, the products were immersed in dichloromethane and sonicated for 2 h, during which the solvent was replenished three times. The solvent was removed under vacuum at 150 °C for 12 h, yielding the degassed MOF powders.

$\text{LiNi}_{0.6}\text{Co}_{0.2}\text{Mn}_{0.2}\text{O}_2$  (NCM622) was prepared through a co-precipitation method as following procedure.<sup>2</sup>

First, the  $\text{Ni}_{0.6}\text{Co}_{0.2}\text{Mn}_{0.2}(\text{OH})_2$  precursor was synthesized by co-

precipitation method. First, nickel acetate ( $\text{Ni}(\text{CH}_3\text{COO})_2 \cdot 4\text{H}_2\text{O}$ ), manganese acetate ( $\text{Mn}(\text{CH}_3\text{COO})_2 \cdot 4\text{H}_2\text{O}$ ) and cobalt acetate ( $\text{Co}(\text{CH}_3\text{COO})_2 \cdot 4\text{H}_2\text{O}$ ), (mol.% of Ni:Co:Mn = 6:2:2) were dissolved in distilled water with a total concentration of  $2 \text{ mol L}^{-1}$ , and the solution was slowly dripped into a reactor.  $4 \text{ mol L}^{-1}$  NaOH and  $1 \text{ mol L}^{-1}$   $\text{NH}_4\text{OH}$  solutions were simultaneously fed into the reactor. The solution was kept at  $50 \text{ }^\circ\text{C}$  with the pH carefully controlled by the rate of NaOH addition to 11 under vigorous stirring for 12 h. After the reaction, the precursor  $\text{Ni}_{0.6}\text{Co}_{0.2}\text{Mn}_{0.2}(\text{OH})_2$  was filtered, washed, and dried at  $110 \text{ }^\circ\text{C}$ . Second,  $\text{LiNi}_{0.6}\text{Co}_{0.2}\text{Mn}_{0.2}\text{O}_2$  was synthesized by mixing stoichiometric of  $\text{Ni}_{0.6}\text{Co}_{0.2}\text{Mn}_{0.2}(\text{OH})_2$  precursor and 5 mol.% excess LiOH to account for evaporation of lithium at high temperature, then the mixture was sintered at  $470 \text{ }^\circ\text{C}$  for 5 h and calcined at  $850 \text{ }^\circ\text{C}$  for 5 h in air at a heating rate of  $5 \text{ }^\circ\text{C min}^{-1}$ .

MDA@NCM622 was synthesized through a simple mechanochemical synthetic procedure. Reactions were carried out in a ball mill (QM-3B, Nanjing University Instrument Factory, China) using an 80 mL PTFE grinding jar with five 10 mm zirconia balls. A solid mixture of  $\text{LiNi}_{0.6}\text{Co}_{0.2}\text{Mn}_{0.2}\text{O}_2$  (1 g),  $\text{NH}_2\text{-MIL-53}$  (50 mg) and ethanol ( $200 \text{ } \mu\text{L}$ ) was placed into the jar and ground at high speed for 0.5 h.

The as-prepared  $\text{NH}_2\text{-MIL-53@NCM622}$  was transferred into a tube furnace and were annealed at  $600 \text{ }^\circ\text{C}$  for 3 h in air under constant heating

and cooling rates of 5 °C min<sup>-1</sup>.

Al<sub>2</sub>O<sub>3</sub>@NCM622 was conducted in a similar strategy through a simple mechanochemical synthetic protocol by treating as-synthesized LiNi<sub>0.6</sub>Co<sub>0.2</sub>Mn<sub>0.2</sub>O<sub>2</sub> with Al<sub>2</sub>O<sub>3</sub> (25 mg, PDF # 46-1212) powders. The powders were placed into the jar and ground at high speed for 0.5 h. The as-prepared Al<sub>2</sub>O<sub>3</sub>@NCM622 was transferred to a tube furnace and annealed at 600 °C for 3 h in air under constant heating and cooling rates of 5 °C min<sup>-1</sup>.

### **Characterization**

Powder X-ray diffraction (PXRD) technology was used to analyze and study the structure of as-prepared and cycled materials using D8 Advance Bruker powder diffractometer equipped with Cu K $\alpha$  ( $\lambda = 1.54178$  Å) radiation at a scan rate of 10° 2 $\theta$ /min. Fourier transform infrared (FT-IR) spectra were carried out using a Bruker ALPHA FT-IR Spectrometer. Morphology of the particles was determined by field emission scanning electron microscopy (FESEM, JSM 7500F, JEOL) and transmission electron microscopy (TEM, JEM-1200EX, JEOL). Elemental mappings were recorded by a JEOL 2100F transmission electron microscope operated at 200 kV. ICP-MS (Inductive coupled plasma mass spectrometry) was tested by Varian 725 inductively coupled plasma mass spectrometer. X-ray photoelectron spectroscopy (XPS) was performed on

the Thermo Scientific ESCALab 250Xi using 200 W monochromated Al K $\alpha$  radiation.

Electrochemical measurements were carried out using coin-type cells (CR2032) assembled in an argon-filled glove box. For preparing the working electrode, a mixture of active material, Super P, and poly(vinylidene fluoride) (PVDF) at a weight ratio of 80:10:10 was pasted on a pure aluminum foil. The loading level of active materials is about 2–3 mg cm<sup>-2</sup>. Lithium foil was used as a counter electrode. A celgard 2400 porous membrane was used as a separator and the electrolyte consisted of a solution of 1 M LiPF<sub>6</sub> in ethylene carbonate/dimethyl carbonate (1:1, v%). Galvanostatic tests of the assembled cells were performed in the voltage range of 3.0-4.5 V (vs Li<sup>+</sup>/Li) at desired current densities at room temperature using a CT2001A Land instrument. EIS data were collected after charging samples at 4.5 V during 30 cycles with amplitude of 5 mV in the frequency range of 1 MHz to 1 mHz by an electrochemical workstation (CHI 760E: CH Instrumental Inc.). Cyclic voltammetry (CV) was performed also using CHI 760E over 3.0-4.5 V at a scanning rate 0.1 mV s<sup>-1</sup>.

The mass of active material is calculated base on the sum of NCM622 and coating material.

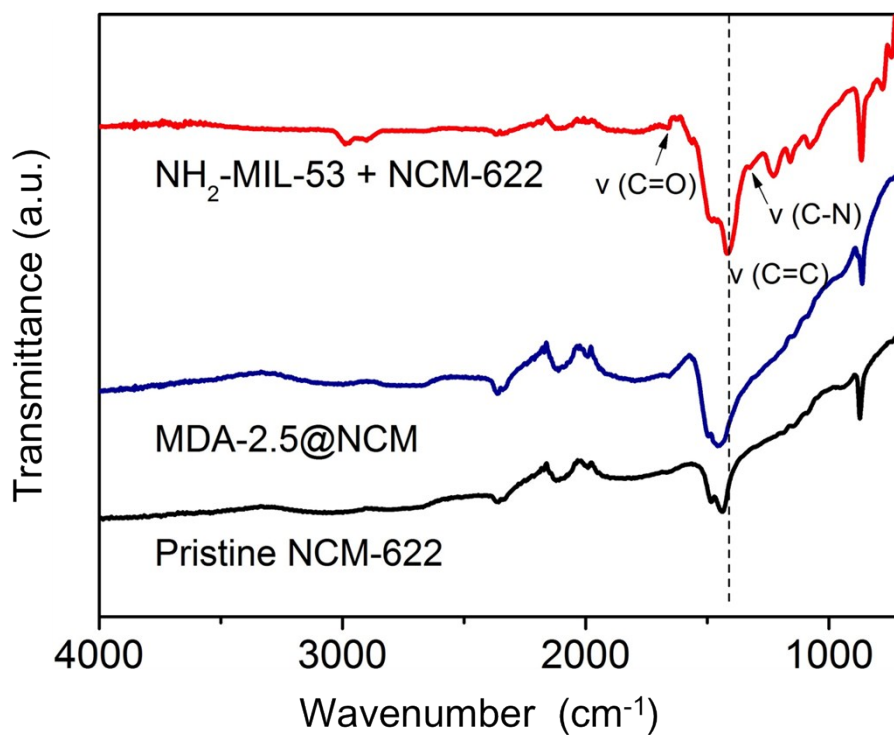

**Fig. S1** FTIR images of pristine NCM-622, MDA-2.5@NCM and NH<sub>2</sub>-MIL-53 ball milled with NCM-622.

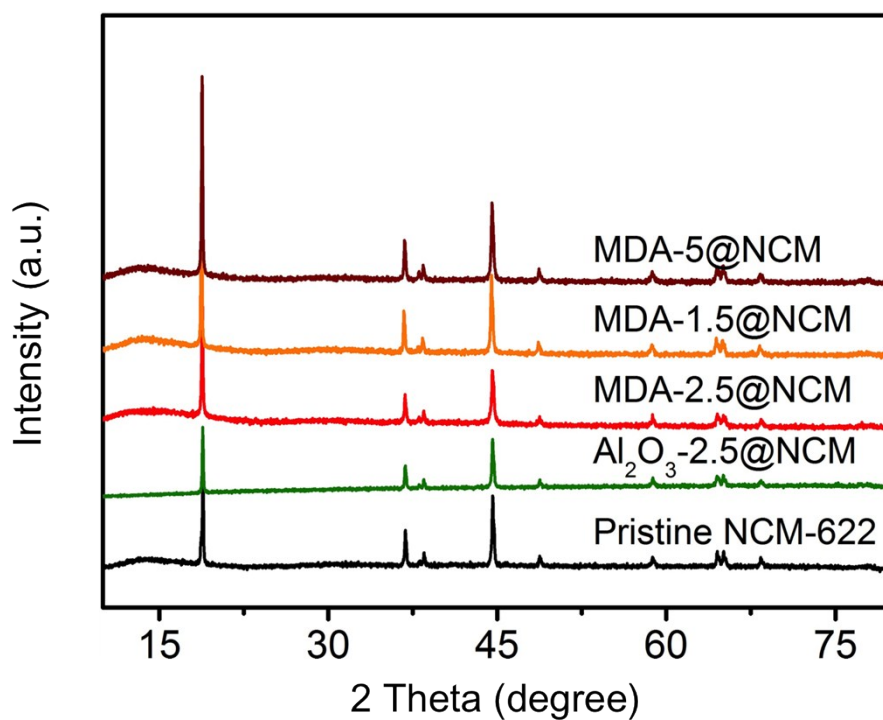

**Fig. S2** PXRD patterns of pristine and coated NCM-622.

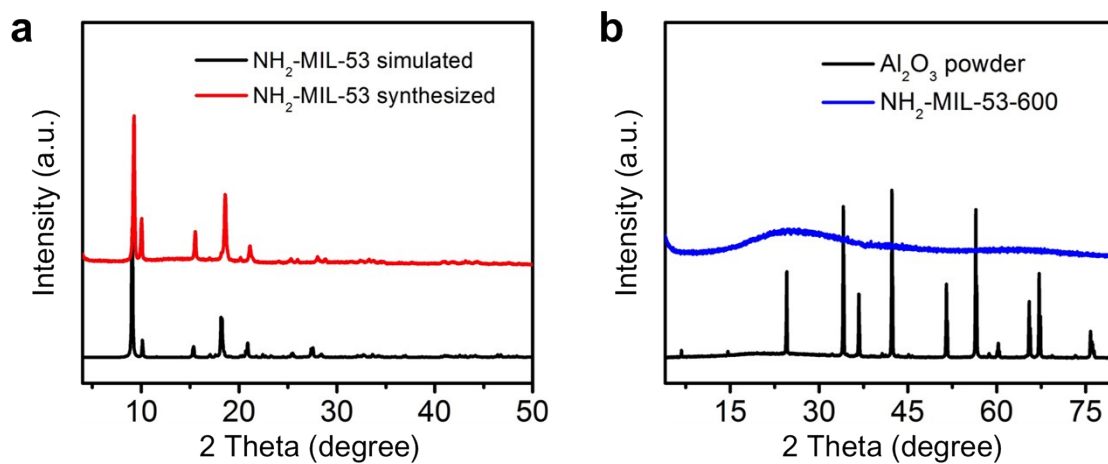

**Fig. S3** PXRD patterns of (a) NH<sub>2</sub>-MIL-53, (b) NH<sub>2</sub>-MIL-53 after calcination at 600 °C in comparison with pure commercial Al<sub>2</sub>O<sub>3</sub> powder (PDF # 46-1212).

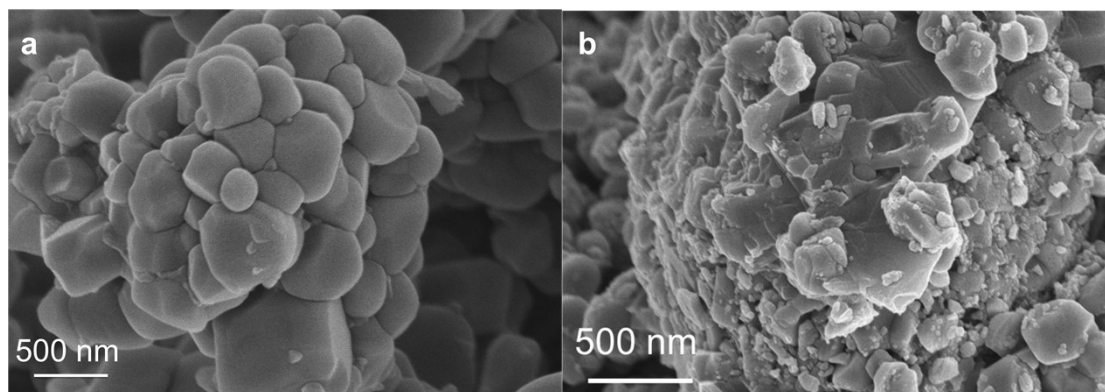

**Fig. S4** SEM image of (a) pristine NCM-622 and (b) MDA-2.5@NCM.

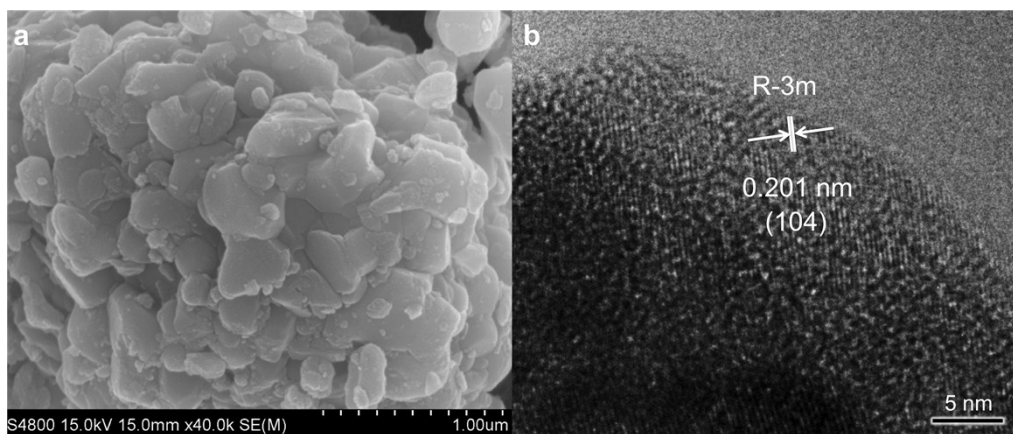

**Fig. S5** (a) SEM image and (b) HRTEM image of pristine NCM-622 (ball-milled).

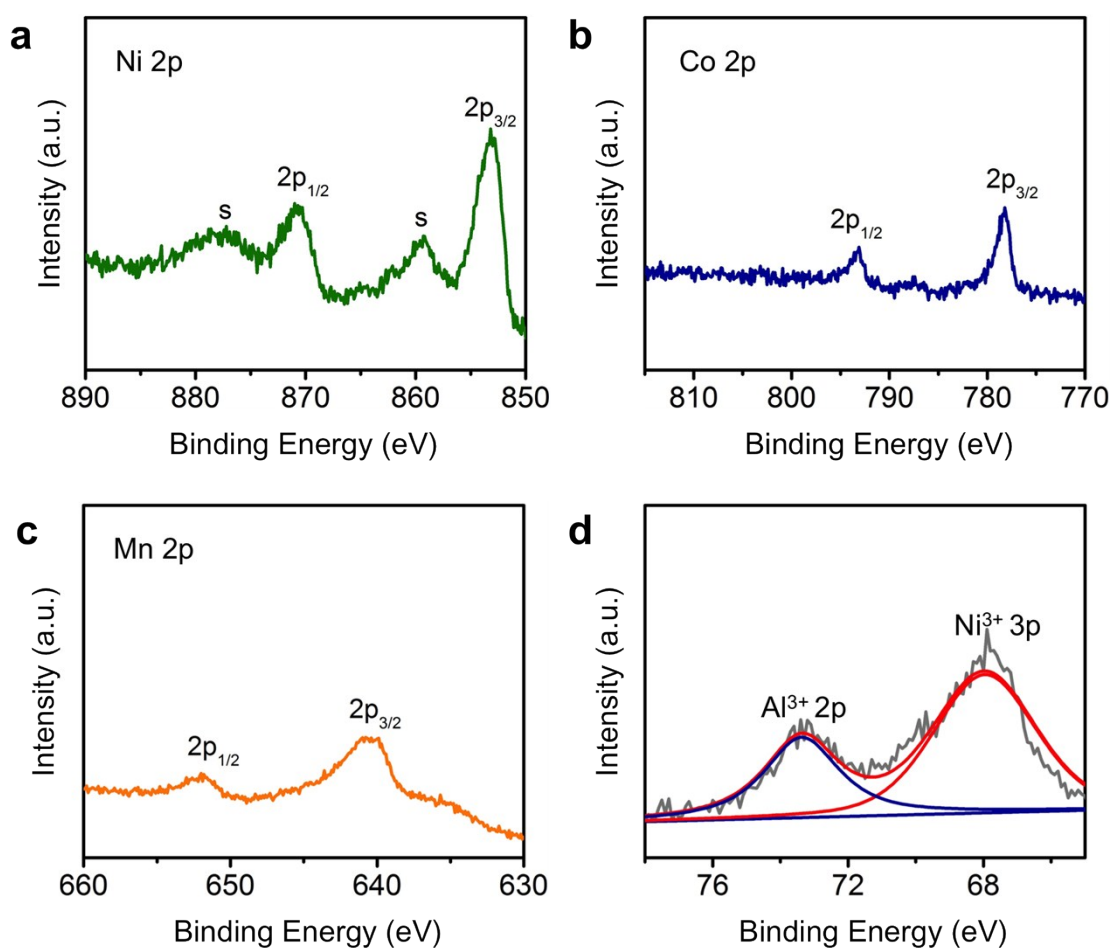

**Fig. S6** (a) Ni 2p, (b) Co 2p, (c) Mn 2p and (d) Al 2p XPS data of MDA-2.5@NCM.

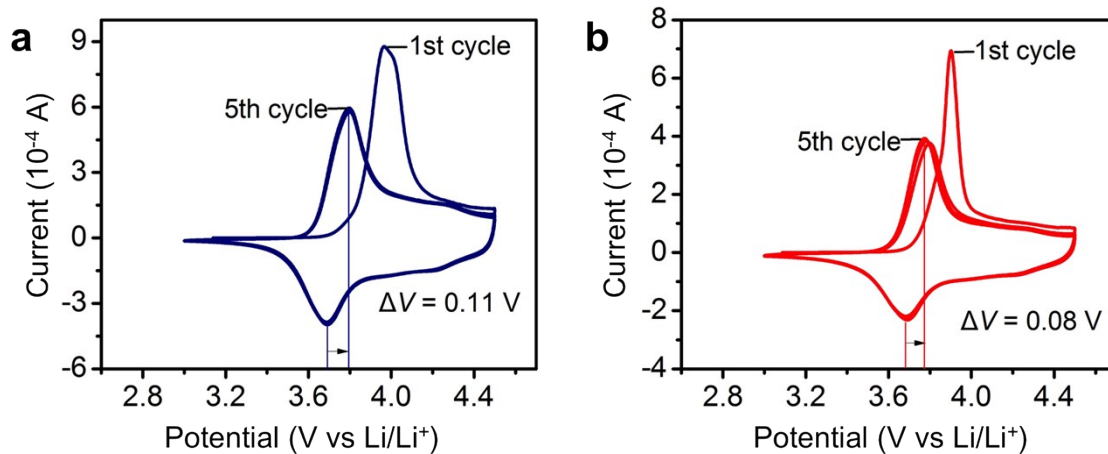

**Fig. S7** Cyclic voltammetry of (a) pristine NCM-622 and (b) MDA-2.5@NCM at a scan rate of  $0.1 \text{ mV s}^{-1}$  over 3-4.5 V for 5 cycles.

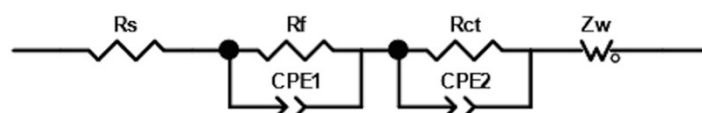

**Fig. S8** Equivalent circuit performed to fit the Nyquist plots of in Fig. 4c and 4d.



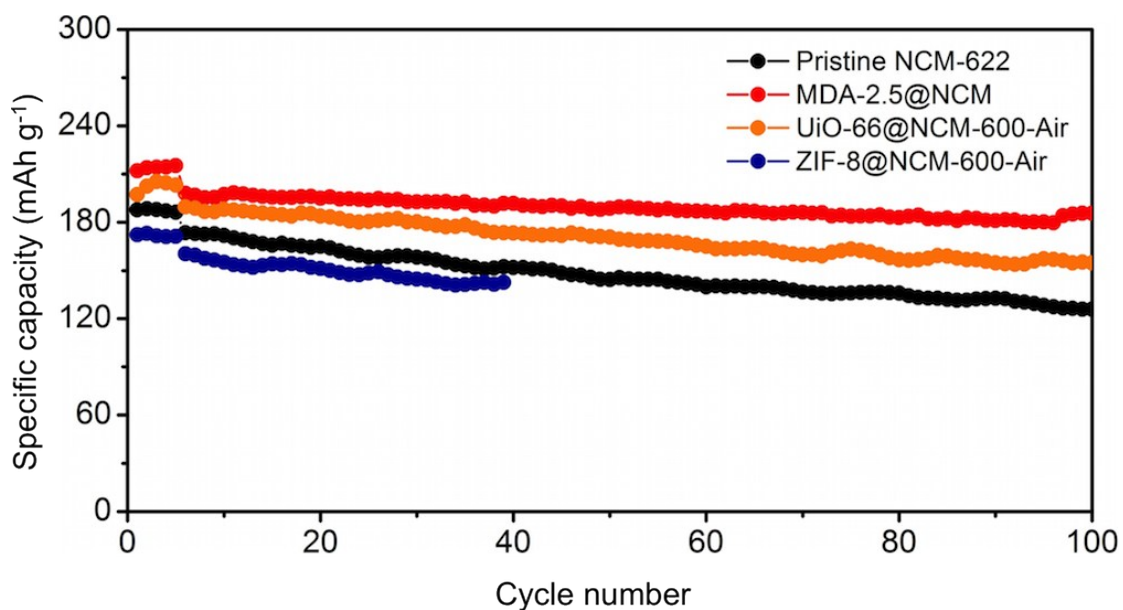

**Fig. S9** Cycling performance (0.2 C at first 5 cycles) of the pristine and coated NCM-622 over 3-4.5 V at a current of 1 C (1 C = 140 mA g<sup>-1</sup>).

**Table S1** Impedance parameters fitted for the pristine and coated NCM samples from equivalent circuits of the cells after different cycles.

| Samples | Bare           |                |                 | MDA-2.5@NCM    |                |                 |
|---------|----------------|----------------|-----------------|----------------|----------------|-----------------|
|         | R <sub>s</sub> | R <sub>f</sub> | R <sub>ct</sub> | R <sub>s</sub> | R <sub>f</sub> | R <sub>ct</sub> |
| 1st     | 4.7            | 33.9           | 124.3           | 3.5            | 26.2           | 100.5           |
| 100th   | 11.5           | 105            | 1094            | 5.4            | 67.3           | 284.5           |

**Table S2** Different coating materials for NCM-622 (under ambient temperature or 25 °C).

| Coating material                                                | Cut off voltage (V) | Current density (mA g <sup>-1</sup> ) | 1 <sup>st</sup> discharge capacity (mA h g <sup>-1</sup> ) | Cycle number | Capacity Retention <sup>a</sup> (%) |
|-----------------------------------------------------------------|---------------------|---------------------------------------|------------------------------------------------------------|--------------|-------------------------------------|
| MOF-derived alumina (MDA)                                       | 3-4.5               | 28                                    | 214.6                                                      | -            | -                                   |
|                                                                 |                     | 140                                   | 196.5                                                      | 100          | 92.7                                |
|                                                                 |                     | 280                                   | 186.1                                                      | 100          | 88.9                                |
|                                                                 |                     | 700                                   | 168.5                                                      | 100          | 78.8                                |
| Nano-Al <sub>2</sub> O <sub>3</sub> <sup>3</sup>                | 3-4.5               | 28                                    | 197.1                                                      | -            | -                                   |
|                                                                 |                     | 140                                   | 184.8                                                      | 30           | 91.0                                |
|                                                                 |                     | 280                                   | ~181                                                       | -            | -                                   |
|                                                                 |                     | 700                                   | ~167                                                       | -            | -                                   |
|                                                                 |                     | 1400                                  | ~157                                                       | -            | -                                   |
| Al <sub>2</sub> O <sub>3</sub> /conductive polymer <sup>4</sup> | 2.6-4.3             | 36                                    | ~173                                                       | -            | -                                   |
|                                                                 |                     | 90                                    | 170.1                                                      | 100          | 96.0                                |
|                                                                 |                     | 180                                   | ~162                                                       | -            | -                                   |
|                                                                 |                     | 900                                   | ~136                                                       | -            | -                                   |
| TiO <sub>2</sub> <sup>5</sup>                                   | 3-4.5               | 28                                    | 187.6                                                      | -            | -                                   |
|                                                                 |                     | 140                                   | ~180                                                       | 50           | 88.7                                |
|                                                                 |                     | 280                                   | ~170                                                       | -            | -                                   |
|                                                                 |                     | 700                                   | ~142                                                       | -            | -                                   |
| SiO <sub>2</sub> <sup>6</sup>                                   | 3-4.3               | 0.1 C                                 | 175.7                                                      | -            | -                                   |
|                                                                 |                     | 0.2 C                                 | ~174                                                       | -            | -                                   |
|                                                                 |                     | 0.5 C                                 | 169.5                                                      | 50           | 95.7                                |
|                                                                 |                     | 1 C                                   | ~161                                                       | -            | -                                   |
|                                                                 |                     | 2 C                                   | 153.2                                                      | -            | -                                   |

| Coating material                              | Cut off voltage (V) | Current density (mA g <sup>-1</sup> ) | 1 <sup>st</sup> discharge capacity (mA h g <sup>-1</sup> ) | Cycle number | Capacity Retention <sup>a</sup> (%) |
|-----------------------------------------------|---------------------|---------------------------------------|------------------------------------------------------------|--------------|-------------------------------------|
| PADOT-co-PEG <sup>7</sup>                     | 2.8-4.3             | 36                                    | ~184                                                       | -            | -                                   |
|                                               |                     | 90                                    | ~182                                                       | 100          | 93.9                                |
|                                               |                     | 180                                   | ~180                                                       | -            | -                                   |
|                                               |                     | 900                                   | 166.0                                                      | -            | -                                   |
| rGO <sup>8</sup>                              | 2.8-4.3             | 0.1 C                                 | 174.2                                                      | -            | -                                   |
|                                               |                     | 0.5 C                                 | 161.2                                                      | 50           | 95.7                                |
|                                               |                     | 1 C                                   | 154.9                                                      | -            | -                                   |
|                                               |                     | 2 C                                   | 148.4                                                      | -            | -                                   |
|                                               |                     | 10 C                                  | 105.8                                                      | -            | -                                   |
| Li <sub>2</sub> ZrO <sub>3</sub> <sup>9</sup> | 2.6-4.8             | 27.4                                  | 190                                                        | 50           | 85                                  |
|                                               |                     | 137                                   | ~177                                                       | -            | -                                   |
|                                               |                     | 274                                   | ~166                                                       | -            | -                                   |
| Li <sub>3</sub> PO <sub>4</sub> <sup>10</sup> | 3-4.3               | 28                                    | ~172                                                       | 150          | 94.1                                |
|                                               |                     | 280                                   | ~168                                                       | -            | -                                   |
|                                               |                     | 840                                   | ~164                                                       | -            | -                                   |
|                                               |                     | 1400                                  | ~160                                                       | -            | -                                   |

<sup>a</sup> Calculated based on the first discharge capacity.

## References

1. M. Pera-Titus, T. Lescouet, S. Aguado and D. Farrusseng, *J. Phys. Chem. C*, 2012, **116**, 9507-9516.
2. K. J. Kim, Y. N. Jo, W. J. Lee, T. Subburaj, K. Prasanna and C. W. Lee, *J. Power Sources*, 2014, **268**, 349-355.

3. Y. Chen, Y. Zhang, F. Wang, Z. Wang and Q. Zhang, *J. Alloys Comp.*, 2014, **611**, 135-141.
4. Y. S. Lee, W. K. Shin, A. G. Kannan, S. M. Koo and D. W. Kim, *ACS Appl. Mater. Interfaces*, 2015, **7**, 13944-13951.
5. Y. Chen, Y. Zhang, B. Chen, Z. Wang and C. Lu, *J. Power Sources*, 2014, **256**, 20-27.
6. W. Cho, S. M. Kim, J. H. Song, T. Yim, S. G. Woo, K. W. Lee, J. S. Kim and Y. J. Kim, *J. Power Sources*, 2015, **282**, 45-50.
7. S. H. Ju, I. S. Kang, Y. S. Lee, W. K. Shin, S. Kim, K. Shin and D. W. Kim, *ACS Appl. Mater. Interfaces*, 2014, **6**, 2546-2552.
8. P. Yue, Z. Wang, Q. Zhang, G. Yan, H. Guo and X. Li, *Ionics*, 2013, **19**, 1329-1334.
9. S. Sun, C. Du, D. Qu, X. Zhang and Z. Tang, *Ionics*, 2015, **21**, 2091-2100.
10. C. H. Jo, D. H. Cho, H. J. Noh, H. Yashiro, Y. K. Sun and S. T. Myung, *Nano Research*, 2014, **8**, 1464-1479.
